# Supplementary material for: Strategic Sustainable Development in International Sport Organisations: A Delphi Study
Source: MDPI journal article supplement (doi:10.3390/su14169874), 2022-08-10
Supplement: s1 [file s1]

## Supplementary Materials

**Table S1.** Statements rated in the second round above the consensus level of 80%

| Item                                                                               | Mean | SD   | Agreement % |
|------------------------------------------------------------------------------------|------|------|-------------|
| Embed sustainability requirements in the bidding processes for the sport events    | 4.80 | 0.40 | 100         |
| Strategically prioritise sustainability                                            | 4.77 | 0.47 | 100         |
| Make lasting and planned rather than one-off and ad hoc efforts                    | 4.77 | 0.56 | 95          |
| Take actions to implement sustainable policies                                     | 4.75 | 0.48 | 100         |
| Initiate more sustainability specific and focused actions                          | 4.62 | 0.49 | 100         |
| Take into consideration the legacy and sustainability of sport facilities          | 4.60 | 0.66 | 90          |
| Change business operations to more environmentally sustainable                     | 4.55 | 0.50 | 100         |
| Initiate and support organisational behaviour change                               | 4.55 | 0.59 | 95          |
| Implement projects in support of gender equality                                   | 4.50 | 0.92 | 95          |
| Follow the principle: "Do what you preach"                                         | 4.48 | 0.50 | 100         |
| Base sustainability policies on operationalisable and measurable objectives        | 4.48 | 0.50 | 100         |
| Establish a comprehensive, coherent and concerted commitment from all stakeholders | 4.45 | 0.59 | 95          |
| Support sport event organisers in sustainable efforts                              | 4.40 | 0.66 | 90          |

|                                                                                                                    |      |      |     |
|--------------------------------------------------------------------------------------------------------------------|------|------|-----|
| Introduce safeguarding policies                                                                                    | 4.40 | 1.02 | 85  |
| Appreciate that sport can influence directly and indirectly                                                        | 4.33 | 0.89 | 81  |
| Embed sport events in a wider scheme of sustainable development of the host city                                   | 4.30 | 0.90 | 100 |
| Raise awareness about the potential and achievements of sport in sustainable development in the general population | 4.30 | 0.78 | 90  |
| Use sport events to raise awareness about sustainable development                                                  | 4.30 | 0.78 | 90  |
| Use competitive sport to advocate for being physically active                                                      | 4.30 | 0.78 | 85  |
| Use athletes as ambassadors and role models                                                                        | 4.30 | 0.95 | 85  |
| Tailor the sustainability approach according to the organisational context                                         | 4.29 | 0.70 | 86  |
| Avoid greenwashing                                                                                                 | 4.29 | 0.70 | 86  |
| Establish closer cooperation with the government agencies                                                          | 4.25 | 0.70 | 95  |
| Establish cross-sectorial partnerships                                                                             | 4.25 | 0.70 | 95  |
| Use sponsors to support sustainable actions                                                                        | 4.25 | 0.77 | 95  |
| Link with sponsors and contractors based on their sustainable practices and products                               | 4.25 | 0.70 | 90  |
| Build the capacity of grassroots under-represented groups                                                          | 4.25 | 0.94 | 90  |
| Improve organisational good governance                                                                             | 4.25 | 1.13 | 80  |
| Adopt a multi-, cross-sectorial approach at international, country, local and institutional level                  | 4.24 | 0.68 | 86  |

|                                                                                                                 |      |      |     |
|-----------------------------------------------------------------------------------------------------------------|------|------|-----|
| Define how sport can contribute                                                                                 | 4.24 | 0.68 | 86  |
| Increase information and good practice exchange                                                                 | 4.20 | 0.6  | 90  |
| Adapt the sustainability language to make it more accessible and understandable to diverse grassroots audiences | 4.20 | 0.75 | 90  |
| Introduce the sustainable sourcing code                                                                         | 4.15 | 0.73 | 90  |
| Target youth in policies and programmes                                                                         | 4.15 | 0.79 | 85  |
| Establish closer cooperation with civil society                                                                 | 4.15 | 1.01 | 80  |
| Increase the representation of all stakeholders without tokenism                                                | 4.10 | 0.81 | 81  |
| Set sustainability standards for organisational members                                                         | 4.2  | 0.68 | 85  |
| Prevent and penalise negative manifestations in and around sport                                                | 4.00 | 1.11 | 81  |
| Offset the carbon emissions                                                                                     | 4.00 | 0.76 | 81  |
| Revise organisational practices, not only map the existing activities to SDGs                                   | 4.00 | 1.05 | 80  |
| Be specific about the role of the organisation                                                                  | 3.90 | 0.92 | 100 |

**Table S2.** Statements rated in the second round below the consensus level of 80%

| <b>Item</b>                                                                                                                                                              | <b>Mean</b> | <b>SD</b> | <b>Agreement %</b> |
|--------------------------------------------------------------------------------------------------------------------------------------------------------------------------|-------------|-----------|--------------------|
| Include only sports in line with sustainable development in the Olympic program                                                                                          | 3.15        | 1.31      | 42                 |
| Clarify what exactly "sport" means                                                                                                                                       | 3.24        | 1.11      | 33                 |
| Clarify and devise ownership of sport, physical activity and physical education                                                                                          | 3.29        | 1.08      | 43                 |
| Focus sport policy frameworks on health                                                                                                                                  | 3.48        | 0.73      | 52                 |
| Allow more preparation time for sport events                                                                                                                             | 3.55        | 0.86      | 58                 |
| Impose sustainable equipment regulations                                                                                                                                 | 3.60        | 0.92      | 68                 |
| Introduce a negotiable rather than competitive bid system                                                                                                                | 3.70        | 1.23      | 68                 |
| Build the capacity of cadre                                                                                                                                              | 3.75        | 1.04      | 74                 |
| Raise awareness about global agendas within sport, physical activity and physical education organisations                                                                | 3.75        | 1.26      | 65                 |
| Rethink and re-evaluate current aims around sport: maximisation of participation even in non-sustainable activities, more spectators, money for the rights holders, etc. | 3.80        | 0.93      | 70                 |
| Put athletes at the centre of interest                                                                                                                                   | 3.80        | 1.08      | 55                 |
| Undertake own programmes and activities for grassroots levels                                                                                                            | 3.85        | 1.01      | 68                 |

|                                                                                                                     |      |      |    |
|---------------------------------------------------------------------------------------------------------------------|------|------|----|
| Facilitate trickle-down effects through rules and regulations                                                       | 3.86 | 0.83 | 67 |
| Make SDG 13: Climate change a priority                                                                              | 3.86 | 0.83 | 67 |
| Encourage a bottom-up approach: empowering people on the grassroots to act in a sustainable way                     | 3.86 | 0.99 | 62 |
| Establish and use sport's distinctive selling point for sustainable development                                     | 3.86 | 0.99 | 62 |
| Engage groups beyond their own main target group to make a wider societal impact                                    | 3.90 | 0.70 | 70 |
| Increase cross-sectorial collaboration with the municipal level governments as they are the closest to the citizens | 3.90 | 0.94 | 60 |
| Decrease spectators' mobility footprint                                                                             | 3.95 | 0.74 | 70 |
| Establish a top-down approach by defining and aligning priorities                                                   | 4.00 | 0.82 | 76 |
| Provide event legacy to a wide group of stakeholders                                                                | 4.00 | 1.05 | 74 |
| Connect sport for development and wider sport system                                                                | 4.00 | 1.05 | 70 |
| Educate general public about sustainable development                                                                | 4.10 | 1.04 | 70 |
| Acknowledge that sport for development programmes can contribute but depending on the environment                   | 4.10 | 0.94 | 70 |
| Promote and encourage active mobility                                                                               | 4.10 | 0.87 | 67 |
| Train and educate teachers and coaches                                                                              | 4.15 | 0.79 | 75 |
| Align with other sustainability and sport frameworks (e.g. Kazan Action Plan, SDG Agenda, Green Deal)               | 4.19 | 1.01 | 76 |

|                                                                                                |      |      |    |
|------------------------------------------------------------------------------------------------|------|------|----|
| Connect with media to use them to display the contribution of sport to sustainable development | 4.20 | 0.93 | 75 |
| Employ both, a top-down and a bottom-up approach                                               | 4.20 | 0.94 | 74 |
| Increase awareness of SDG Agenda and sustainable development within sport organisations        | 4.25 | 0.83 | 75 |
