# Supplementary material for: Strategic Sustainable Development in International Sport Organisations: A Delphi Study
Source: MDPI journal article supplement (doi:10.3390/su14169874), 2022-08-10
Supplement: s1 [file s1]

Archive with 1 entries (1 files):
- sustainability-1804904-supplementary.pdf
